# Supplementary material
Source: PubMed Central journal article supplement (PMC10330469)
Supplement: NIHMS1902916-supplement-Supplementary.pdf [file NIHMS1902916-supplement-Supplementary.pdf]

# 1 Contents

|   |                                                                  |           |
|---|------------------------------------------------------------------|-----------|
| 2 | <b>1 Supplementary Text</b>                                      | <b>1</b>  |
| 3 | 1.1 Model comparison . . . . .                                   | 1         |
| 4 | 1.2 Additional behavioral analysis . . . . .                     | 2         |
| 5 | 1.3 Encoding rejected values . . . . .                           | 3         |
| 6 | 1.4 Encoding unseen values . . . . .                             | 4         |
| 7 | 1.5 Exploratory signaling in vmPFC uncertainty neurons . . . . . | 4         |
| 8 | <b>2 Supplementary Tables</b>                                    | <b>5</b>  |
| 9 | <b>3 Supplementary Figures</b>                                   | <b>11</b> |

## 10 1 Supplementary Text

### 11 1.1 Model comparison

12 We utilized a nested model comparison to determine how well four different computational models explained the  
13 observed behavior. These models allowed for uncertainty and novelty to contribute to decision making beyond what  
14 could be implemented with a simpler reinforcement learning framework and also allowed incorporating patients'  
15 individual preferences. The compared models had two main mechanisms for how novelty, uncertainty, and q-value  
16 interacted to create stimulus utility: uncertainty bonuses and novelty initiation biases (see Materials and Methods  
17 for detailed model descriptions).

18 To create the fully nested model analysis, our first model was a simple reinforcement learning model with a  
19 learning rate  $\alpha$  and an inverse temperature  $\beta$  for the softmax function which determines decision probabilities given  
20 the two stimulus utilities. The second model (uncertainty bonus model) we tested worked by adding an uncertainty  
21 bonus to stimulus utilities, according to each patient's uncertainty preference. This model also included the learning  
22 rate and the inverse temperature parameters. In this model, stimulus utility is equal to a linear combination of the  
23 stimulus q-value and the uncertainty bonus. The third model had a learning rate, an inverse temperature, and a  
24 novelty bias incorporated into the initial q-value of each stimulus at the beginning of a block. This model attempts  
25 to capture patients' tendency to assign biased values to novel stimuli with the purpose of directing exploration  
26 (Wittmann et al., 2008). The fourth model we tested (uncertainty bonus + novelty initiation bias) expands on  
27 the previous models by incorporating all of its elements, including uncertainty bonus and novelty initiation biases  
28 together.

29 We performed model fitting and comparisons for the four models across the patient population using hierarchical  
30 Bayesian inference (Piray et al., 2019) (see Supplementary Fig. 1 for values of fit parameters). The estimated model  
31 frequencies for Models 1-4 were (0.006,0.558,0.001,0.433), indicating that Models 2 (uncertainty bonus only) and  
32 4 (uncertainty bonus + novelty initiation bias) shared most of the responsibility in explaining patient behavior in  
33 this task.

34 These behavioral modeling results show that a combination of uncertainty-based and novelty-based mechanisms  
35 is appropriate to model the behavior of our subjects. Therefore, for all subsequent neural data analysis we used  
36 the variables derived from the model which better explained the data for each session. In total, Model 2 was used  
37 for 13/22 sessions, while Model 4 was used for 9/22 sessions.

## 38 1.2 Additional behavioral analysis

39 We summarized model parameter fits to gain more insight into the behavior of the patients as a group (Supple-  
40 mentary Fig. 1 A,B), using the parameters from each session’s best explanatory model. For the uncertainty bonus  
41 model (Model 2), the mean softmax inverse temperature was  $4.02 \pm 0.62$  and the mean learning rate was  $0.35 \pm 0.03$ .  
42 The uncertainty intercept (uI) parameter represents how much value was assigned to uncertainty. On average, this  
43 parameter was negative ( $-0.22 \pm 0.04$ ,  $p < 0.001$ , t-test), indicating a slight uncertainty avoidance for sessions best  
44 explained by Model 2. For the uncertainty bonus + novelty initiation bias model (Model 4), the mean softmax  
45 inverse temperature was  $5.1 \pm 0.7$  and the mean learning rate was  $0.34 \pm 0.05$ . The novelty initiation bias indicates  
46 a initial tendency to overvalue novel stimuli ( $0.49 \pm 0.02$ ,  $p < 0.001$ , t-test), which can support early exploratory  
47 behavior. Additionally, in this model the uncertainty intercept was not significantly different from zero across  
48 sessions ( $0.0008 \pm 0.06$ ,  $p = 0.982$ , t-test), indicating a variety of uncertainty preferences in patients whose behavior  
49 was also influenced by novelty.

50 To ensure that the models correctly reproduce the effects of expected value, uncertainty and novelty observed  
51 in our subjects, we simulated behavior to perform model fits and performed a posterior predictive check analysis.  
52 We exposed Models 2 and 4 to the same sequence of trials each patient experienced, with each patient’s model  
53 fits (for their respective best explanatory model). We then generated a decision for each trial, using the decision  
54 probabilities inferred from the model. To directly compare real patient behavior with behavior simulated from  
55 model estimates, we fit simulated choices using a model-agnostic logistic regression to map effects of the various  
56 variables on choices, and then compared these fits with those obtained with true behavior in the task. To account  
57 for variability in probabilistic decisions, we repeated this procedure 100 times and generated a distribution of  
58 regression coefficient estimates, which we compared to the actual effects observed in the subjects. To quantify  
59 the difference in how these models recovered effects of expected value, uncertainty and novelty on behavior, we  
60 computed the 95% confidence intervals for the logistic regression estimates of value feature effects on actual patient  
61 decisions (as displayed in Fig. 1, see Materials and Methods). Then, we obtained the proportion of overlap  
62 between these confidence intervals and the recovered effect estimates obtained from 100 iterations of simulated  
63 sessions in the posterior predictive check analysis (Supplementary Fig. 1 D,E). Using the uncertainty bonus model,  
64 we observed an overlap of [93%, 23%, 73%] for the estimates of expected, uncertainty and novelty, respectively. With  
65 the uncertainty bonus + novelty initiation bias model, we obtained overlaps of [75%, 94%, 89%]. Therefore, while  
66 Model 2 was able to more parsimoniously describe behavior in a larger number of sessions, parameter estimates  
67 from Model 4 resulted in simulated behavior which more closely resembled qualitative uncertainty preferences from

68 real behavior. Additionally, both models generated parameter estimates which successfully captured qualitative  
69 EV and novelty preference patterns from real behavior. It is possible that the smaller overlap in uncertainty  
70 estimates for the uncertainty bonus model is due to the patient cohort for this model concentrating uncertainty  
71 averse individuals, leading to negatively biased behavioral estimates, while the estimates from simulated behavior  
72 take into account parameters which are hierarchically fit, taking into account the entire patient population.

73 To quantify whether simulated decisions themselves are well explained by the model, we constructed a  $R^2$   
74 metric which summarizes how high the modeled probabilities were for each simulated decision. We display the  
75 results for each of the 100 simulated iterations and each of the 22 sessions in Supplementary Fig. 1C. Intuitively,  
76 if a model succeeds at predicting decisions, then the probability assigned by the model to each simulated decision  
77 should be higher than for a model which predicts decisions at random. Note that decision probabilities  $pChoice$   
78 are obtained from a softmax comparison between the two stimulus utilities. Therefore, we utilize the following  
79 definitions (Cockburn et al., 2022): the total log-likelihood of the model, applied to a simulated decision time series  
80 containing  $T$  trials, is

$$LLE = \sum_{t=1}^T \log(pChoice(t)) \quad (1)$$

81 For a null model which always predicts that the two decisions are equally likely ( $pChoice = 0.5$ ), its log-likelihood  
82 is

$$LLE_{null} = \sum_{t=1}^T \log(0.5) = T \log(0.5) \quad (2)$$

83 Finally, we define the  $R^2$  as follows. Note that a model which always predicts decisions perfectly should have  
84  $R^2 = 1$  and a model which predicts decisions at random should average  $R^2 = 0$ , while a model which predicts every  
85 decision wrongly would have  $R^2$  diverge to negative infinity.

$$R^2 = 1 - \frac{LLE}{LLE_{null}} \quad (3)$$

### 86 1.3 Encoding rejected values

87 Models of decision making often also depend on maintaining information about the value of options not chosen  
88 to evaluate the outcome received. We therefore also examined whether rejected q-values, uncertainty bonuses and  
89 novelties were represented (Supplementary Fig. 3 A-C). Unlike selected q-values, preSMA did represent rejected  
90 q-values (trial onset 13.9%,  $p = 0.002$ ;, pre-decision: 14.7%,  $p = 0.002$ , permutation test). Additionally, vmPFC  
91 represented rejected uncertainty bonuses (trial onset 14.5%,  $p = 0.002$ ;, pre-decision: 11.0%,  $p = 0.004$ , permutation  
92 test). Neuron count p-values were Bonferroni corrected.

## 93 1.4 Encoding unseen values

94 One hypothesis is that the value of the option that was not presented in a trial is also tracked by neurons. To test  
95 this hypothesis, we focused on sessions which contained 3 possible stimuli per block (long version, see Supplementary  
96 Table 1), and tracked the integrated utility value of stimuli which were not offered in each trial (unseen option  
97 GLM, Supplementary Table 2). We found that vmPFC contained a significant neuron count for the utility unseen  
98 stimuli in a trial (trial onset: 14.9%,  $p = 0.002$ ; pre-decision: 11.9%,  $p = 0.002$ , permutation test).

## 99 1.5 Exploratory signaling in vmPFC uncertainty neurons

100 One potential reason for representing the uncertainty of the selected option is to enable exploratory decision  
101 making, which would entail deliberately choosing an item with lower q-value. We therefore divided trials into  
102 putative explore and non-explore categories. Trials in which the patient chose the option which had the lower  
103 q-value but the higher uncertainty bonus were classified as putative explore trials, while all others were classified  
104 as non-explore trials (Supplementary Fig. 3G).

105 Then, in the sub-populations of vmPFC and preSMA neurons in the pre-decision period that were sensitive to  
106 selected uncertainty, we performed a Poisson GLM analysis using the explore trial flag as a regressor (Explore Flag  
107 GLM, Supplementary Table 2), correcting for selected uncertainty as a regressor of no interest. We subsequently  
108 tested whether neurons whose activity was significantly modulated by the explore flag significantly overlapped with  
109 the sub-populations of vmPFC and preSMA neurons that encoded selected uncertainty (Supplementary Fig. 3H).  
110 We found a significant overlap in preSMA ( $p < 0.001$ , Jaccard index test), but not in vmPFC ( $p = 0.059$ , Jaccard  
111 index test). Therefore, a significant proportion of preSMA selected uncertainty neurons signal whether a trial is  
112 exploratory or not prior to button press, suggesting a possible neural substrate through which exploratory decisions  
113 can be monitored.

114 **2 Supplementary Tables**

| Positive neurons  |              | vmPFC                  | dACC                  | preSMA                 |
|-------------------|--------------|------------------------|-----------------------|------------------------|
| action q-value    | trial onset  | 5/8 (62.5 %) p=0.727   | 6/9 (66.7 %) p=0.508  | 7/18 (38.9 %) p=0.481  |
|                   | pre-decision | 4/7 (57.1 %) p=1       | 3/6 (50 %) p=1        | 6/17 (35.3 %) p=0.332  |
| action unc. bonus | trial onset  | 2/17 (11.8 %) p=0.002  | 3/7 (42.9 %) p=1      | 8/15 (53.3 %) p=1      |
|                   | pre-decision | 5/17 (29.4 %) p=0.143  | 0/8 (0 %) p=0.007     | 8/11 (72.7 %) p=0.227  |
| action novelty    | trial onset  | 7/12 (58.3 %) p=0.774  | 3/7 (42.9 %) p=1      | 3/7 (42.9 %) p=1       |
|                   | pre-decision | 3/7 (42.9 %) p=1       | 4/7 (57.1 %) p=1      | 5/7 (71.4 %) p=0.453   |
| sel. q-value      | trial onset  | 11/18 (61.1 %) p=0.481 | 6/13 (46.2 %) p=1     | 7/15 (46.7 %) p=1      |
|                   | pre-decision | 10/17 (58.8 %) p=0.629 | 4/9 (44.4 %) p=1      | 2/12 (16.7 %) p=0.038  |
| sel. unc. bonus   | trial onset  | 4/17 (23.5 %) p=0.049  | 2/9 (22.2 %) p=0.180  | 8/22 (36.4 %) p=0.286  |
|                   | pre-decision | 5/22 (22.7 %) p=0.016  | 1/11 (9.09 %) p=0.011 | 7/16 (43.8 %) p=0.804  |
| sel. novelty      | trial onset  | 9/16 (56.3 %) p=0.804  | 3/7 (42.9 %) p=1      | 6/12 (50 %) p=1        |
|                   | pre-decision | 9/18 (50 %) p=1        | 3/6 (50 %) p=1        | 4/9 (44.4 %) p=1       |
| action utility    | trial onset  | 3/6 (50 %) p=1         | 3/7 (42.9 %) p=1      | 12/28 (42.9 %) p=0.572 |
|                   | pre-decision | 1/7 (14.3 %) p=0.125   | 3/7 (42.9 %) p=1      | 5/19 (26.3 %) p=0.0636 |
| sel. utility      | trial onset  | 7/14 (50 %) p=1        | 6/14 (42.9 %) p=0.791 | 8/22 (36.4 %) p=0.286  |
|                   | pre-decision | 9/21 (42.9 %) p=0.664  | 3/10 (30 %) p=0.344   | 4/19 (21.1 %) p=0.019  |

Supplementary Table 1: Proportion of neurons significantly coding each variable of interest with a positive correlation (i.e. higher firing rates for higher values of each variable). For the action variables, which had left and right components (i.e. action q-values, uncertainty bonus, novelty, and utility), we only included neurons which coded both the left and right components positively or negatively, excluding neurons which had different signs for the t-score corresponding to left and right components. We obtained p-values for a 2-tailed binomial test for whether either positive or negative coding was larger than expected by chance, assuming a chance level of 0.5.

| <b>Name</b>                   | <b>Model</b>                                                                                       | <b>Periods</b>            |
|-------------------------------|----------------------------------------------------------------------------------------------------|---------------------------|
| Action-value model            | $\log(E(Y x)) = b_0 + b_1Q_L + b_2Q_R + b_3B_L + b_4B_R + b_5N_L + b_6N_R$                         | trial onset, pre-decision |
| Selection-based model         | $\log(E(Y x)) = b_0 + b_1Q_{sel} + b_2Q_{rej} + b_3B_{sel} + b_4B_{rej} + b_5N_{sel} + b_6N_{rej}$ | trial onset, pre-decision |
| Selection-based utility model | $\log(E(Y x)) = b_0 + b_1U_{sel} + b_2U_{rej}$                                                     | trial onset, pre-decision |
| Decision and utility model    | $\log(E(Y x)) = b_0 + b_1U_L + b_2U_R + b_3Decision$                                               | trial onset, pre-decision |
| Unseen option model           | $\log(E(Y x)) = b_0 + b_2U_{unseen} + b_2U_{sel} + b_3U_{rej}$                                     | trial onset, pre-decision |
| Explore flag model            | $\log(E(Y x)) = b_0 + b_1Explore + b_2B_{sel}$                                                     | pre-decision              |
| Outcome model                 | $\log(E(Y x)) = b_0 + b_1O + b_2Q_{sel} + b_3 RPE $                                                | outcome                   |

Supplementary Table 2: Models for Poisson GLM single neuron encoding analysis. Action-value model: includes q-value, uncertainty, and novelty, splitting by values of stimuli presented on the left or the right of the screen. In all models,  $x$  is a shorthand for the independent variable vector and  $Y$  is the spike count in the window of interest. Selection-based model: Same, but splitting by values of stimuli which were chosen or rejected in each trial. Selection-based utility model: includes the utility of the selected and rejected stimuli. Decision and utility model: includes the utility of stimuli presented on the left and the right of the screen, and the decision made on each trial (binary indicator for left/right button press). Unseen option model (fit only in sessions with 3 stimuli, not utilized in sessions with 5 stimuli): includes the q-value of the option not presented in each trial, controlling for the q-values of the selected and rejected options. Explore flag model: includes a binary flag for whether patients made an exploratory decision in each trial or not, correcting by the uncertainty bonus of the selected option. Exploratory trials were those in which the selected option had a higher uncertainty bonus and lower q-value than the rejected option. Outcome model: includes the binary outcome of each trial (win/no-win), selected q-values, and absolute reward prediction errors.

| Patient ID | Sex | Age | Left dACC          | Right dACC        | Left preSMA       | Right preSMA      | Left vmPFC         | Right vmPFC        |
|------------|-----|-----|--------------------|-------------------|-------------------|-------------------|--------------------|--------------------|
| P71CS      | M   | 40  | -1.00,27.97,27.02  | 7.68,28.87,23.68  | -1.89,13.51,38.03 | 5.09,11.30,39.61  | -3.04,32.45,-0.64  | 5.06,34.29,6.30    |
| P70CS      | F   | 30  | -0.84,23.06,26.04  | 4.25,22.06,22.63  | -9.45,11.24,46.67 | 12.40,11.55,46.60 | -0.20,26.30,-6.79  | 10.50,29.65,-3.63  |
| P69CS      | F   | 41  | -6.13,27.44,22.69  | -1.66,27.37,22.25 | -2.02,23.89,39.02 | 2.92,32.34,40.50  | -3.73,38.30,-11.69 | 2.26,29.24,-9.80   |
| P67CS      | F   | 38  | -4.82,27.63,-11.69 | -0.27,28.18,-9.13 | -2.63,10.61,37.48 | 7.38,11.36,36.23  | -4.70,27.32,-14.06 | -1.21,28.12,-7.68  |
| P65CS      | F   | 55  | -4.66,24.50,24.48  | 5.66,30.60,25.28  | -0.82,10.87,52.78 | 1.53,18.10,48.52  | -3.69,45.06,-12.11 | 6.46,30.94,-11.70  |
| P64CS      | F   | 63  | -7.45,35.50,22.73  | 5.54,32.54,30.78  | -6.19,21.34,47.67 | 7.46,22.79,44.56  | -8.18,30.42,-13.39 | 6.21,31.14,-12.75  |
| P63CS      | F   | 48  | -5.57,27.44,26.20  | 11.66,34.65,33.43 | -8.53,10.02,41.57 | 9.46,28.48,48.52  | -3.52,45.04,-14.44 | 9.54,37.31,-13.49  |
| P62CS      | F   | 25  | NaN                | 9.02,15.72,29.33  | NaN               | 5.69,16.28,49.18  | NaN                | 11.02,34.13,-10.05 |
| P61CS      | F   | 52  | 0.00,19.15,22.74   | 6.82,20.21,27.63  | -4.55,14.50,38.70 | 14.92,12.05,36.59 | -3.40,41.84,-15.66 | 6.99,31.03,-12.39  |
| P60CS      | M   | 67  | -8.66,30.23,27.13  | 5.62,31.09,20.05  | -8.70,19.60,44.90 | 5.55,26.23,42.00  | -1.49,31.63,-16.97 | 2.48,33.28,-20.24  |
| P56CS      | M   | 48  | -7.01,23.11,30.17  | 16.27,24.79,25.90 | -6.92,6.43,46.70  | 29.08,13.01,45.88 | -6.96,34.62,-13.05 | 27.02,31.69,-5.48  |
| P55CS      | F   | 43  | -4.14,28.97,24.60  | 3.20,28.05,21.05  | -3.88,11.08,46.18 | 7.58,13.24,42.29  | -8.64,36.74,-6.98  | 6.32,35.04,-11.70  |
| P54CS      | F   | 59  | -3.85,29.02,23.70  | 7.93,33.96,26.74  | -5.98,20.87,49.08 | 10.72,26.92,48.06 | -3.53,36.85,-16.95 | 3.94,31.75,-14.51  |
| P53CS      | M   | 60  | 0.95,32.02,27.76   | 9.47,36.81,26.07  | -4.30,12.32,51.06 | 10.21,18.90,49.06 | -0.97,35.20,-17.12 | 6.83,31.74,-14.96  |
| P51CS      | M   | 17  | -5.48,31.63,27.98  | 6.65,30.73,25.95  | -8.81,8.15,44.07  | 11.91,9.98,47.01  | -1.03,36.31,-10.91 | 4.19,30.23,-15.23  |
| P49CS      | F   | 24  | -8.72,34.10,25.92  | 6.21,31.04,25.99  | -5.54,25.16,31.55 | 6.86,26.19,38.56  | -7.02,36.94,-13.11 | 10.87,35.06,-5.09  |
| P48CS      | F   | 32  | -3.34,28.54,24.20  | 5.87,40.15,17.96  | -7.58,24.03,37.93 | 11.91,23.85,40.98 | -8.06,36.04,-6.05  | 13.66,37.28,-17.09 |
| P47CS      | M   | 32  | -0.67,25.84,20.14  | 1.43,25.49,17.20  | -7.86,12.20,42.04 | 8.11,11.45,45.05  | -1.98,40.24,-15.36 | 1.02,38.60,-13.11  |
| P43CS      | F   | 42  | -2.85,23.88,24.58  | 5.29,27.07,24.76  | -2.83,9.40,43.93  | 5.33,8.85,46.26   | -4.26,38.19,-12.07 | 5.11,38.48,-16.47  |
| P41CS      | F   | 21  | 0.18,26.56,17.92   | 12.67,27.14,19.01 | -0.04,12.88,58.69 | 6.99,15.53,57.30  | -3.17,37.28,-7.56  | 8.67,38.04,-15.47  |

Supplementary Table 3: Patient sex, age, and MNI coordinates for microelectrode positioning in dACC, preSMA and vmPFC.

| Task version         | Patients who performed it               |
|----------------------|-----------------------------------------|
| Longer (300 trials)  | P60,P61,P62,P63,P64,P65,P67,P69,P70,P71 |
| Shorter (206 trials) | P41,P43,P48,P49,P51,P54,P55,P56         |

Supplementary Table 4: Patients who performed the longer (300 trials) or shorter (206 trials) version of the task. For all behavioral and neural analyses, datasets from both task versions were pooled.



| <b>Variable</b>   | <b>Abbreviation</b> |
|-------------------|---------------------|
| Q-value           | Q                   |
| Uncertainty bonus | B                   |
| Novelty           | N                   |
| Utility           | U                   |
| Outcome           | O                   |

Supplementary Table 5: Abbreviations for Poisson GLM regressors: q-value, uncertainty bonus, novelty, utility, and outcome.

|                   |              | vmPFC                   | dACC                    | preSMA                  |
|-------------------|--------------|-------------------------|-------------------------|-------------------------|
| action q-value    | trial onset  | 12/172 (6.98 %) p=0.180 | 11/102 (10.8 %) p=0.012 | 22/136 (16.2 %) p=0.002 |
|                   | pre-decision | 14/172 (8.14 %) p=0.072 | 7/102 (6.86 %) p=0.258  | 21/136 (15.4 %) p=0.002 |
| action unc. bonus | trial onset  | 17/172 (9.88 %) p=0.002 | 10/102 (9.8 %) p=0.032  | 18/136 (13.2 %) p=0.002 |
|                   | pre-decision | 18/172 (10.5 %) p=0.004 | 8/102 (7.84 %) p=0.154  | 14/136 (10.3 %) p=0.012 |
| action novelty    | trial onset  | 11/172 (6.4 %) p=0.258  | 7/102 (6.86 %) p=0.264  | 7/136 (5.15 %) p=0.522  |
|                   | pre-decision | 10/172 (5.81 %) p=0.396 | 7/102 (6.86 %) p=0.248  | 10/136 (7.35 %) p=0.16  |
| sel. q-value      | trial onset  | 18/172 (10.5 %) p=0.002 | 13/102 (12.7 %) p=0.002 | 14/136 (10.3 %) p=0.014 |
|                   | pre-decision | 16/172 (9.3 %) p=0.018  | 9/102 (8.82 %) p=0.068  | 12/136 (8.82 %) p=0.050 |
| sel. unc. bonus   | trial onset  | 17/172 (9.88 %) p=0.002 | 9/102 (8.82 %) p=0.070  | 20/136 (14.7 %) p=0.002 |
|                   | pre-decision | 21/172 (12.7 %) p=0.002 | 11/102 (10.8 %) p=0.022 | 15/136 (11 %) p=0.002   |
| sel. novelty      | trial onset  | 15/172 (8.72 %) p=0.022 | 7/102 (6.86 %) p=0.246  | 12/136 (8.82 %) p=0.040 |
|                   | pre-decision | 18/172 (10.5 %) p=0.002 | 6/102 (5.88 %) p=0.414  | 8/136 (5.88 %) p=0.398  |
| action utility    | trial onset  | 8/172 (4.65 %) p=0.664  | 10/102 (9.8 %) p=0.048  | 29/136 (21.3 %) p=0.002 |
|                   | pre-decision | 8/172 (4.65 %) p=0.658  | 7/102 (6.86 %) p=0.270  | 19/136 (14 %) p=0.002   |
| decision          | trial onset  | 14/172 (8.14 %) p=0.05  | 3/102 (2.94 %) p=0.892  | 11/136 (8.09 %) p=0.084 |
|                   | pre-decision | 11/172 (5.81 %) p=0.362 | 4/102 (3.92 %) p=0.786  | 19/136 (14 %) p=0.002   |
| sel. utility      | trial onset  | 14/172 (8.14 %) p=0.056 | 14/102 (13.7 %) p=0.002 | 22/136 (16.2 %) p=0.002 |
|                   | pre-decision | 20/172 (11.6 %) p=0.002 | 9/102 (8.82 %) p=0.080  | 17/136 (12.5 %) p=0.002 |

Supplementary Table 6: Poisson GLM encoding analysis results for each variable of interest, indicating total number of significant neurons relative to total neuron count in each brain area. Uncorrected p-values from permutation tests are reported.

116 **3** Supplementary Figures

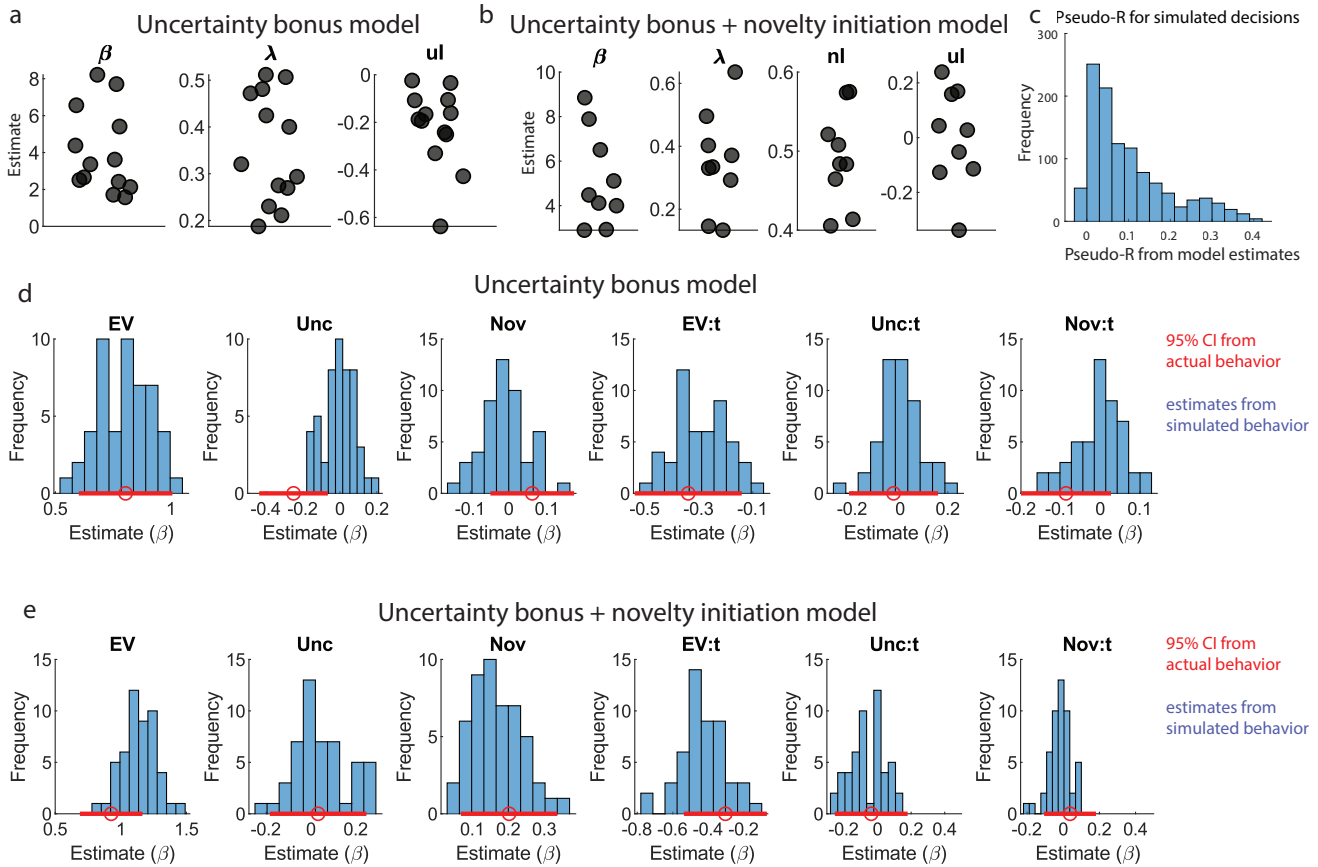

Supplementary Figure 1: Model fits, simulations, and posterior predictive check for exploration models with uncertainty and novelty. (a) Individual uncertainty bonus model parameter fits. Each dot represents a parameter fit for each patient (Left to right: softmax inverse temperature  $\beta$ ; learning rate  $\lambda$ ; novelty intercept; uncertainty intercept). (b) Same, for model with uncertainty bonus and novelty initiation bonus. (c) Pseudo-R metric for simulated behavior fits. For each simulated session, a pseudo-R score is obtained by comparing its simulated decisions and the decision probabilities assigned to them by the computational model fit to behavior from that session. (d) Posterior predictive check for a model which included a softmax beta, a learning rate, and an uncertainty bonus intercept as free parameters. We fit this model to patient behavior and re-exposed a simulated agent with the obtained model parameters to the same set of trials which patients experienced 50 times, to generate decisions according to the estimated decision probabilities. We then fit a logistic regression for the effect of each variable (left to right: expected values, uncertainty, novelty, and their respective interactions with trial number) on decision in the artificial agents (blue histogram) and compared it to the actual estimate given true decisions concatenated across patients (red line; dot indicates mean and bars indicate 95% confidence interval). (e) Same, for the model which has all the previously mentioned parameters plus a novelty initiation bonus.

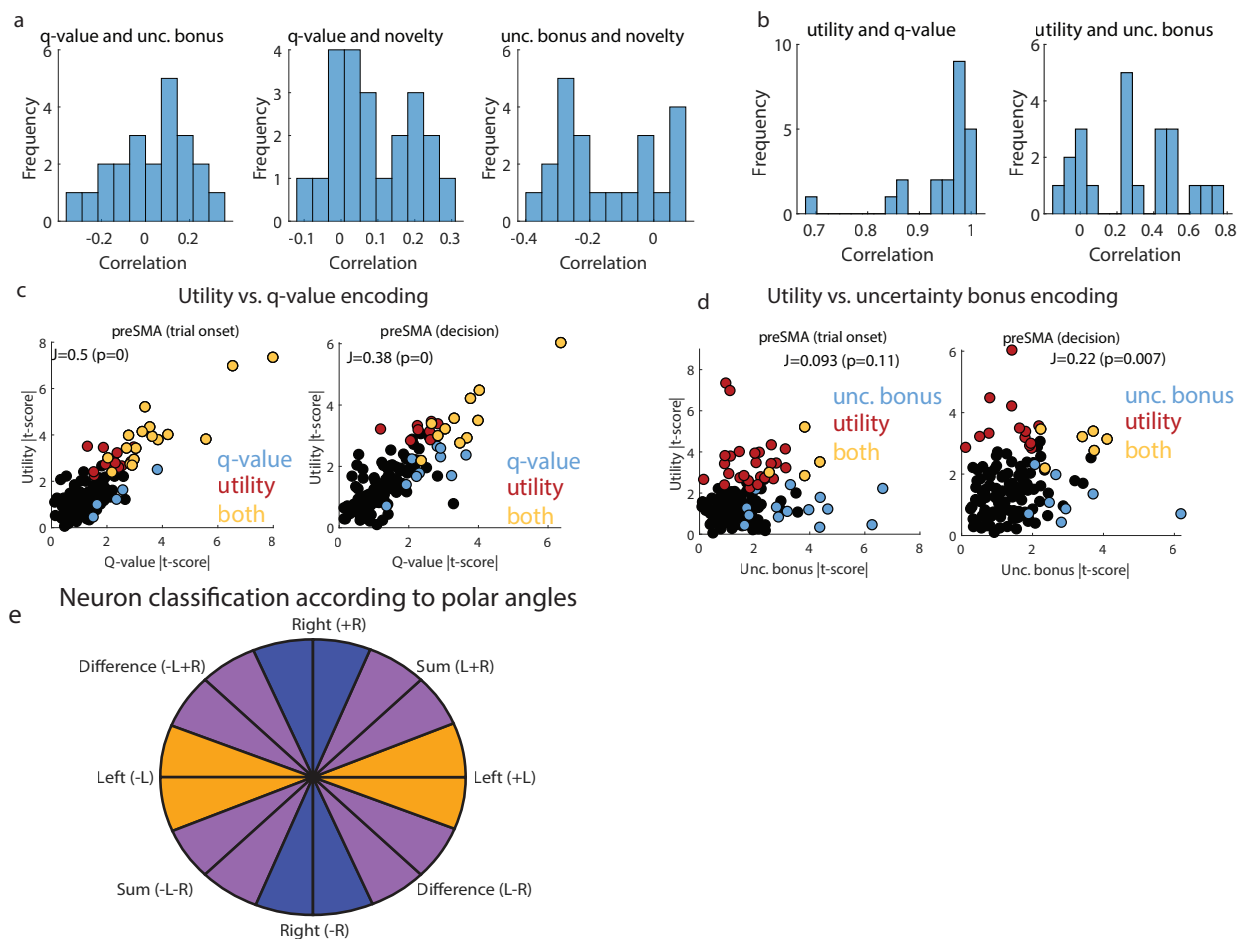

Supplementary Figure 2: Summarizing action-value encoding and comparing encoding of utility versus value components. (a) Left: Histogram of correlation between action q-value and action uncertainty bonus trial vectors, across recording sessions. Center: same, for action q-value and action novelty. Right: same, for action uncertainty bonus and action novelty. (b) Histogram of correlation between utility and q-value (left), or utility and uncertainty bonus (right) trial vectors, across recording sessions. (c) Given the sizeable correlations between utility and its components, we mapped out the extent to which utility preSMA neurons also correlated with q-value preSMA neurons, in the trial onset period (left), and the pre-decision period (right). We plot q-value t-scores from the action-value GLM, as well as the utility t-scores from the utility and decision GLM (black: non-sensitive neurons; blue: left q-value neurons; red: left utility neurons; yellow: neurons concurrently sensitive for both). We tested whether this overlap is significant and report the Jaccard index ( $J$ ), as well as p-values from the Jaccard test of overlap. (d) Same, for utility versus uncertainty bonuses. (e) Neural classification scheme for all action-value encoding analyses. Neurons were classified according to the position of their t-scores along a two-dimensional polar plane: as right coding (blue), left coding (yellow) or mixed coding (purple), which could be either as the sum or difference of values.

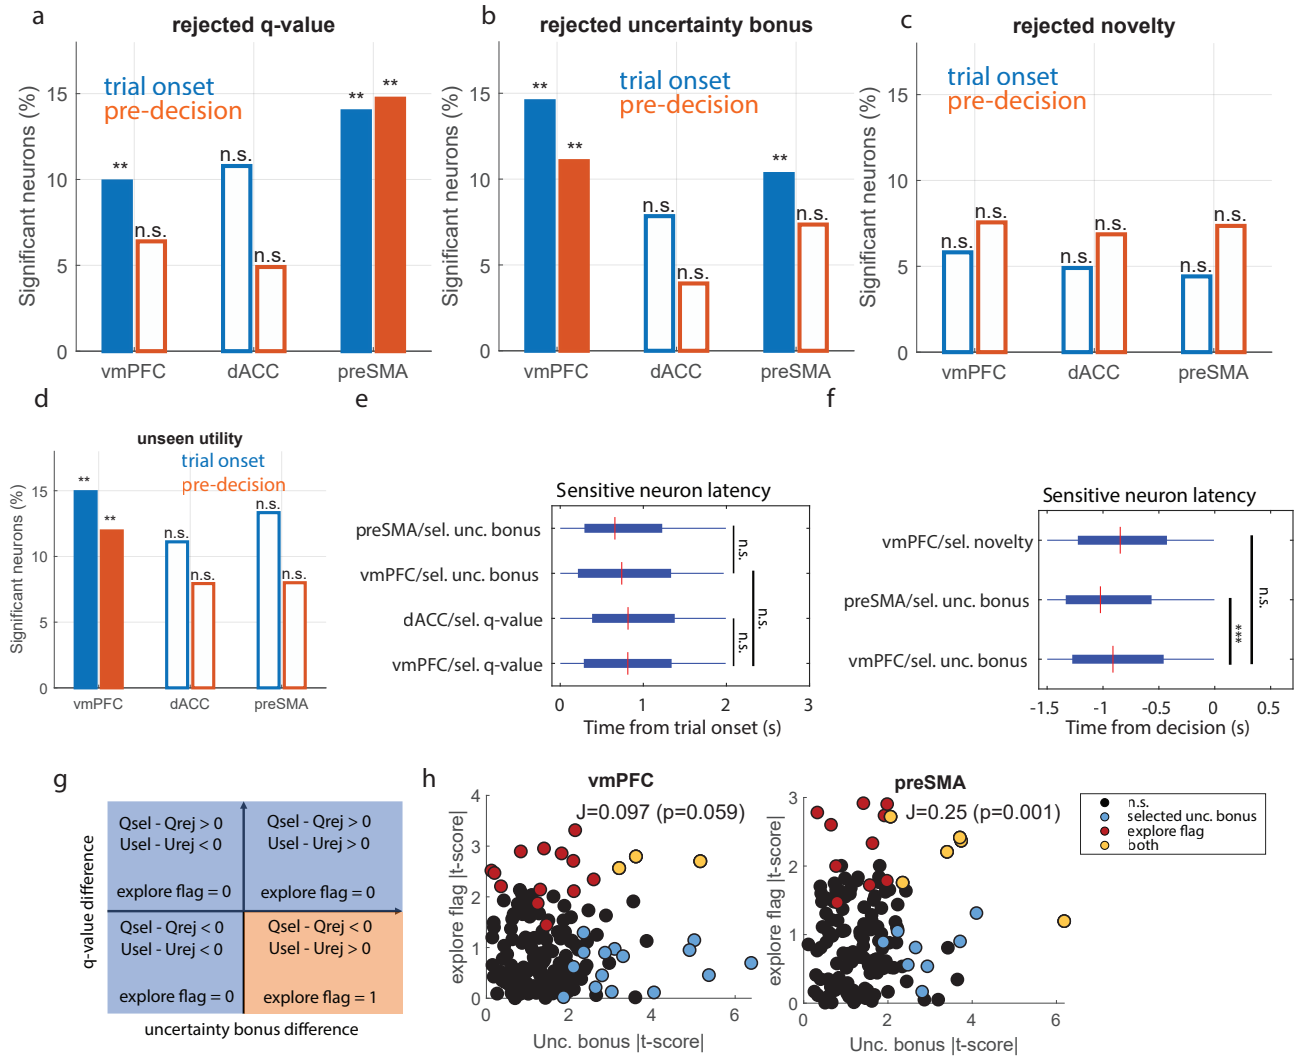

Supplementary Figure 3: Rejected and unseen value coding, selected value timing and exploration. (a) Proportion of neurons sensitive to rejected q-value in vmPFC, dACC, and preSMA, in the trial onset (blue) and pre-decision (orange) periods. P-values as follows: vmPFC, trial onset:  $p = 0.004$ , preSMA, both periods:  $p = 0.002$ . Stars indicate neuron count significance in a one-sided permutation test (\*\* =  $p < 0.01$ ). (b) Same, for rejected uncertainty bonus. vmPFC, trial onset:  $p = 0.002$ ; vmPFC, pre-decision:  $p = 0.004$ ; preSMA, trial onset:  $p = 0.006$ . (c) Same, for rejected novelty. (d) Same, for the integrated utility of the option that was not presented in a trial (only for blocks with 3 available options). vmPFC, both periods:  $p = 0.002$ . (e) Box plots of trial onset aligned latency time across trials for all selected q-value or selected uncertainty bonus neurons in vmPFC, dACC, and preSMA. The red mark indicates the median, and the box extends between the 25th and 75th percentiles of latency times. Bar whiskers extend to the most extreme data points not labeled as outliers, defined as values that are more than 1.5 times the interquartile length away from the edges of the box. Stars indicate significance in a two-sided rank-sum test between latencies for each regressor (\* =  $p < 0.05$ ). (f) Same, for pre-decision aligned analyses. vmPFC vs. preSMA selected unc. bonus:  $p < 0.001$ . (g) Chart indicating how trials were defined as explore or non-explore trials. Trials in which the selected option had lower q-value and higher uncertainty bonus were defined as explore trials (orange) and all other trials were defined as non-explore trials (blue). (h) Scatter plot of selected uncertainty t-scores versus explore flag t-scores from the Poisson GLM analysis. We display neurons sensitive to selected uncertainty bonus (blue), to the explore flag (red), and to both regressors (yellow). We also indicate the Jaccard overlap index and a p-value for the Jaccard test, indicating a significant overlap between uncertainty and exploration coding in individual preSMA neurons. Left: vmPFC neurons; Right: preSMA neurons.

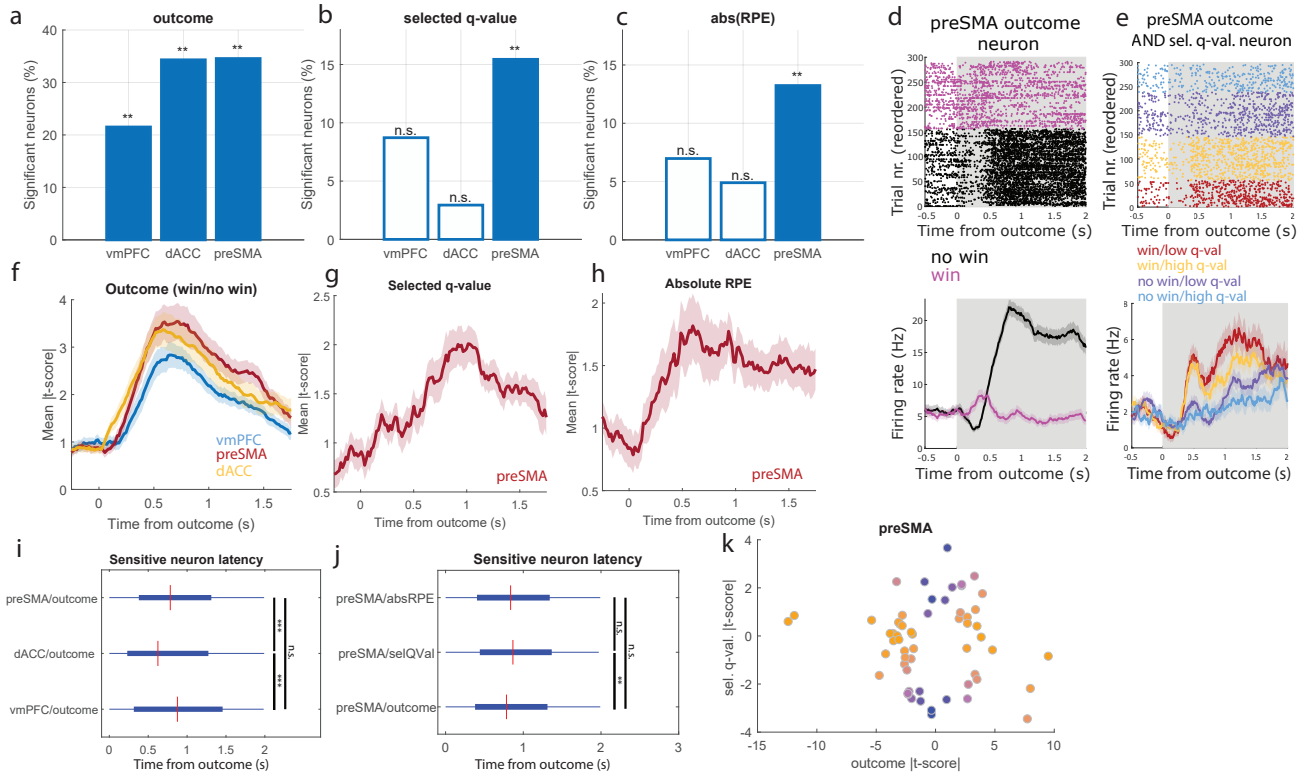

Supplementary Figure 4: Post-feedback encoding. (a) Percentage of outcome neurons in vmPFC, dACC, and preSMA (\*\* =  $p=0.002$  for all regions, one-sided permutation test). (b) Same, for selected q-value. (preSMA:  $p = 0.002$ ) (c) Same, for abs(RPE). (preSMA:  $p = 0.002$ ) (d) Outcome neuron in preSMA. Top: Raster plots. For plotting, we sorted trials by outcome (magenta: win; black: no-win). Bottom: PSTH (bin size = 0.2 s, step size = 0.0625 s). Data are presented as mean values  $\pm$  SEM. (e) Same, for an outcome and selected q-value preSMA neuron. Trials were split into outcome/q-value groups: win/low (red); win/high (yellow); no-win/low (purple); no-win/high (blue). (f) Mean absolute t-score in outcome neurons in vmPFC (blue,  $n=37$  neurons), dACC (red,  $n=35$  neurons), and preSMA (yellow,  $n=47$  neurons). (g) Same, for selected q-value neurons. (h) Same, for absolute RPE neurons. (i) Latency times box plot for outcome neurons in vmPFC, dACC, or preSMA. (\* =  $p<0.05$ ; \*\* =  $p<0.01$ ; \*\*\* =  $p<0.001$ , two-sided rank-sum test). vmPFC vs. dACC:  $p < 0.001$ ; dACC vs. preSMA:  $p < 0.001$ . The red mark indicates the median, and the box extends between the 25th and 75th percentiles of latency times. Bar whiskers extend to the most extreme data points not labeled as outliers, defined as values that are more than 1.5 times the interquartile length away from the edges of the box. (j) Same, comparing preSMA neurons which respond to outcome, selected q-value or absolute RPE. Outcome vs. selected q-value:  $p = 0.009$ . (k) Scatter plot of t-score for neurons which respond to outcome (yellow), selected q-value (blue) or both (purple).
